# Supplementary material
Source: Springer Nature journal article supplement (https://www.springermedizin.de/resource/supplementary/12877_2014_1075_MOESM2_ESM.pdf/9440768)

**A**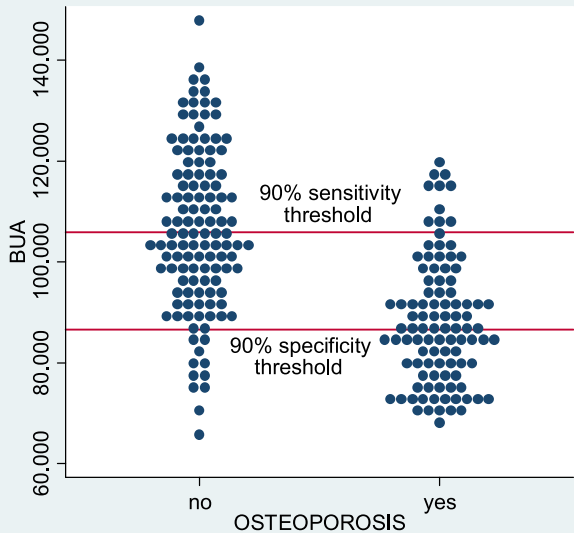**B**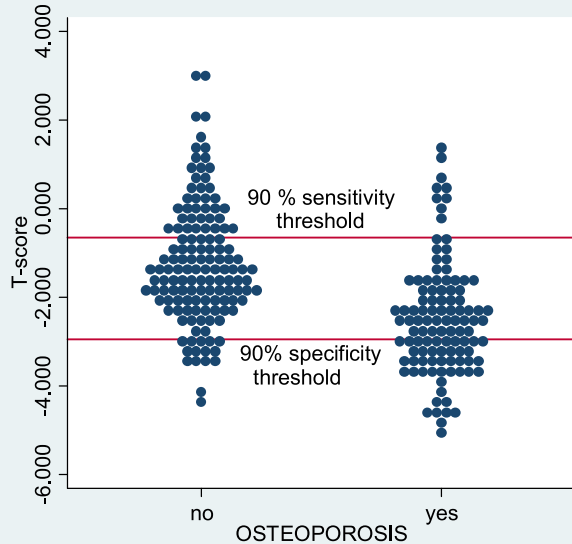

Supplement: MOESM2 [file 9440768]
